# Supplementary material for: Predicting per-lesion local recurrence in locally advanced non-small cell lung cancer following definitive radiation therapy using pre- and mid-treatment metabolic tumor volume
Source: PubMed Central journal article supplement (PMC7238662; doi:10.1186/s13014-020-01546-y), 2020-05-19
Supplement: 13014_2020_1546_MOESM1_ESM.pdf [file 13014_2020_1546_MOESM1_ESM.pdf]

**Supplemental Table 1.** Subset of lesions with  $MTV_{pre} < 25$  cc. Competing risk regression accounting for clustered analysis and competing risk of death.

| Variable                                                          |                   | Local<br>Recurrence<br>(n=21 events)<br>Univariable |
|-------------------------------------------------------------------|-------------------|-----------------------------------------------------|
| Age                                                               | HR<br>95% CI<br>p | 1.04<br>0.96-1.13<br>0.35                           |
| Log( $MTV_{mid}$ )                                                | HR<br>95% CI<br>p | <b>1.92</b><br><b>1.28-2.28</b><br><b>0.002</b>     |
| Primary Lesion (non-nodal target)                                 | HR<br>95% CI<br>p | 2.28<br>0.91-5.66<br>0.08                           |
| Abbreviations: $MTV_{mid}$ =mid-treatment metabolic tumor volume. |                   |                                                     |

**Supplemental Table 2.** Subset of lesions with  $MTV_{pre} \geq 25$  cc. Competing risk regression accounting for clustered analysis and competing risk of death.

| Variable                                                          |                   | Local<br>Recurrence<br>(n=24 events)<br>Univariable |
|-------------------------------------------------------------------|-------------------|-----------------------------------------------------|
| Age                                                               | HR<br>95% CI<br>p | 0.97<br>0.92-1.01<br>0.11                           |
| Log( $MTV_{mid}$ )                                                | HR<br>95% CI<br>p | 1.23<br>0.47-3.27<br>0.67                           |
| Primary Lesion (non-nodal target)                                 | HR<br>95% CI<br>p | 1.12<br>0.41-3.09<br>0.83                           |
| Abbreviations: $MTV_{mid}$ =mid-treatment metabolic tumor volume. |                   |                                                     |
