# Supplementary material for: Predicting per-lesion local recurrence in locally advanced non-small cell lung cancer following definitive radiation therapy using pre- and mid-treatment metabolic tumor volume
Source: PubMed Central journal article supplement (PMC7238662; doi:10.1186/s13014-020-01546-y), 2020-05-19

**Supplemental Figure 1. Incidence of non-cancer death**

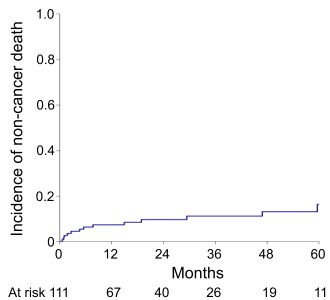

Supplement: 13014_2020_1546_MOESM2_ESM.pdf [file 13014_2020_1546_MOESM2_ESM.pdf]
